# Supplementary material for: Determination of optimal wind turbine alignment into the wind and detection of alignment changes with SCADA data
Source: Copernicus journal article supplement (doi:10.5194/wes-2018-26), 2018-04-03
Supplement: Supplementary file [file wes-2018-26-AC2-supplement.pdf]

Wind Energ. Sci. Discuss., doi.org/10.5194/wes-2018-26-RC1, 2018 © Author(s) 2018. This work is distributed under the Creative Commons Attribution 4.0 License.

Interactive comment on

“Determination of optimal wind turbine alignment into the wind and detection of alignment changes with SCADA data” by Niko Mittelmeier and Martin Kühn

Comment of anonymous Referee #2:

The topic of the article is relevant for many operators and has been addressed by several authors in different ways. The method proposed by the author is although detailed and seemingly elaborate practically feasible. The article is well-written and good to follow with only a few minor spelling errors. A suggestion to make the practical value even greater is to spend some more words on comparing the proposed method for optimization of wtg alignment with competing methods. It is mentioned in the introduction, but why choose this method over others? Is there anything to say about that? For the rest: looking forward to hearing in future the experience of (many) more cases where the method has been applied.

Answer to comment of anonymous Referee #2 by

Niko Mittelmeier and Martin Kühn, May 16, 2018

Dear Referee,

thank you very much for reviewing our paper. We understand your point and it will certainly add value to summarize the advantages of the method in comparison with other solutions on the market.

We will add the following short summary in the discussion section 4.4 “Practical guidance”:

“With this new method, two mayor advantages are achieved, compared to the marked solutions mentioned in the introduction. Firstly, the turbine alignment is not relying on multiple wind direction measurements which reduces uncertainties caused by the challenge of finding true north. And secondly the permanent monitoring application works without the need of additional hardware which reduces the costs for operators.”

Thanks a lot, and best regards,

Niko Mittelmeier
